# Supplementary material for: Origin of enhancement in Raman scattering from Ag-dressed carbon-nanotube antennas: experiment and modelling
Source: Royal Society of Chemistry journal article supplement (doi:10.1039/c7cp06416k), 2018-01-01
Supplement: c7cp06416k1.pdf [file c7cp06416k1.pdf]

## Supporting Information for:

### Origin of Enhancement in Raman Scattering from Ag-dressed Carbon-Nanotube Antennas: Experiment and Modelling

**T.V. Raziman,<sup>a</sup> J-A. Duenas,<sup>b,c</sup> W.I. Milne<sup>d</sup>, O.J.F. Martin<sup>a</sup> and P. Dawson<sup>b\*</sup>**

<sup>a</sup>Nanophotonics and Metrology Laboratory, École Polytechnique Fédérale de Lausanne, CH-1015 Lausanne, Switzerland.

<sup>b</sup>Centre for Nanostructured Media, School of Maths and Physics, Queen's University, Belfast BT7 1NN, U.K.

<sup>c</sup>Present address: Departamento de Ingeniería Eléctrica, Escuela Técnica Superior de Ingeniería, Universidad de Huelva, 21819 Huelva, Spain

<sup>d</sup>Centre for Applied Photonics and Electronics, Cambridge University, 9 JJ Thomson Avenue, Cambridge CB3 0FA, U.K.

<sup>e</sup>Email: [p.dawson@qub.ac.uk](mailto:p.dawson@qub.ac.uk)

# 1 Tabulated data of Raman enhancement (attenuation) factors for bare and Ag-dressed MWCNTs (Si substrate) with inclusion of Ni nanoparticle at top of MWCNTs

**Table S1** Enhancement factors, EF, for MWCNT Raman signals and attenuation factors, AF [in square brackets], for Si-substrate Raman signals for model systems as denoted in left-most column and described in Figure 3 and the text, but with Ni sphere included at the top of the MWCNT in all cases. In the top row (Bare MWCNTs) EF is set to unity with absolute value of  $|E_{loc}|^4$  given assuming input field of unit intensity (1 V/m). The corresponding experimental data are also given where EF and AF are evaluated from the areas beneath the spectra shown in Figure 2 in the range 507 - 531  $cm^{-1}$  (Si-peak) and 1200 – 1700  $cm^{-1}$  (MWCNT D- and G-bands, i.e. excluding the region with the subsidiary peak at  $\sim 1150 cm^{-1}$ ).

|                                  | EF relative to <i>Bare</i> case                     |                                                     | EF relative to <i>Bare</i> case<br>[AF relative to <i>Bare</i> case] |                                                      | Experiment   |                              |
|----------------------------------|-----------------------------------------------------|-----------------------------------------------------|----------------------------------------------------------------------|------------------------------------------------------|--------------|------------------------------|
|                                  | MWCNT                                               |                                                     | Si                                                                   |                                                      | MWCNT        | Si                           |
|                                  | 0°                                                  | 25°                                                 | 0°                                                                   | 25°                                                  |              |                              |
| <i>Bare</i><br>( $ E_{loc} ^4$ ) | 1.00 ± 0.03<br>(3.13 ± 0.08<br>× 10 <sup>-2</sup> ) | 1.00 ± 0.40<br>(4.54 ± 1.77<br>× 10 <sup>-2</sup> ) | 1.00 ± 0.02<br>(1.50 ± 0.002<br>× 10 <sup>-2</sup> )                 | 1.00 ± 0.04<br>(0.98 ± 0.004<br>× 10 <sup>-2</sup> ) | 1.00 ± 0.03  | 1.00 ± 0.01                  |
| <i>Capped</i><br>7.0 nm          | 1.18 ± 0.07                                         | 1.05 ± 0.43                                         | 0.85 ± 0.05<br>[1.16 ± 0.07]                                         | 0.94 ± 0.07<br>[1.06 ± 0.075]                        | 4.22 ± 0.25  | 0.46 ± 0.01<br>2.19 ± 0.04   |
| <i>Coated</i><br>11.0 nm         | 4.50 ± 0.21                                         | 3.4 ± 3.06                                          | 0.124 ± 0.006<br>[8.08 ± 0.37]                                       | 0.113 ± 0.007<br>[8.88 ± 0.54]                       | N/A          | N/A                          |
| <i>Grainy-1</i>                  | 5.27 ± 0.27                                         | 4.4 ± 2.9                                           | 0.083 ± 0.003<br>[12.1 ± 0.4]                                        | 0.018 ± 0.01<br>[55.3 ± 3.2]                         | 14.13 ± 0.85 | 0.173 ± 0.004<br>5.77 ± 0.12 |
| <i>Grainy-2</i>                  | 4.07 ± 0.19                                         | 4.2 ± 3.2                                           | 0.212 ± 0.02<br>[4.72 ± 0.52]                                        | 0.143 ± 0.011<br>[6.97 ± 0.54]                       |              |                              |
| <i>Grainy-3</i>                  | 3.51 ± 0.17                                         | 3.9 ± 3.1                                           | 0.263 ± 0.024<br>[3.80 ± 0.35]                                       | 0.177 ± 0.010<br>[5.66 ± 0.38]                       |              |                              |
